# Supplementary material
Source: PubMed Central journal article supplement (PMC9584316)
Supplement: iai.00210-22-s0001.pdf [file iai.00210-22-s0001.pdf]

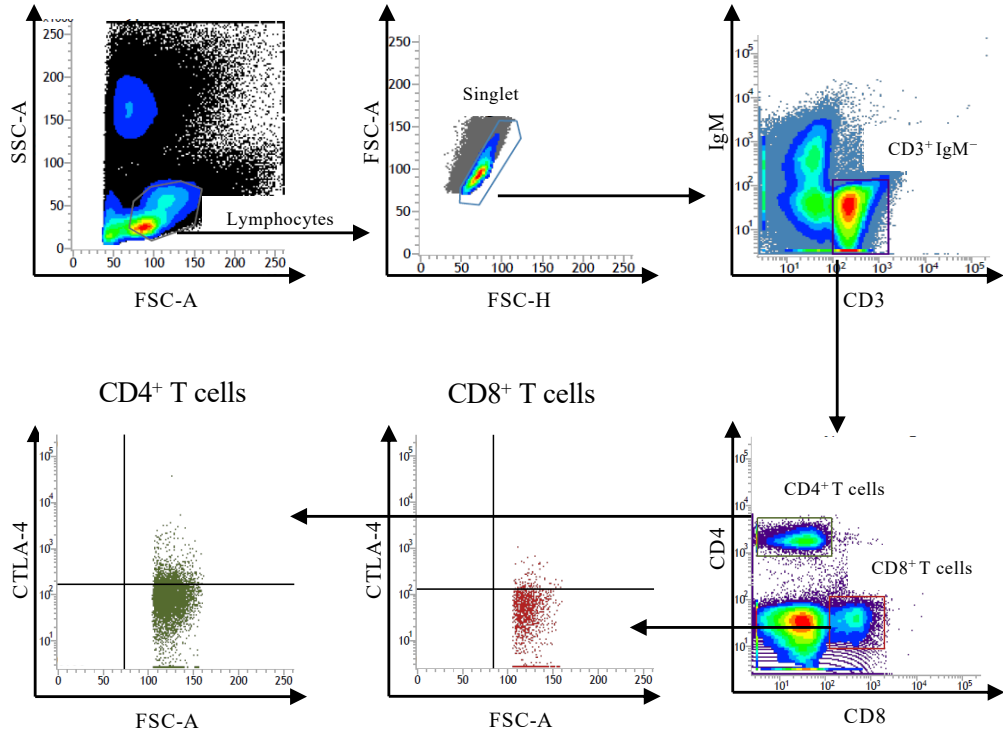

Fig. S1

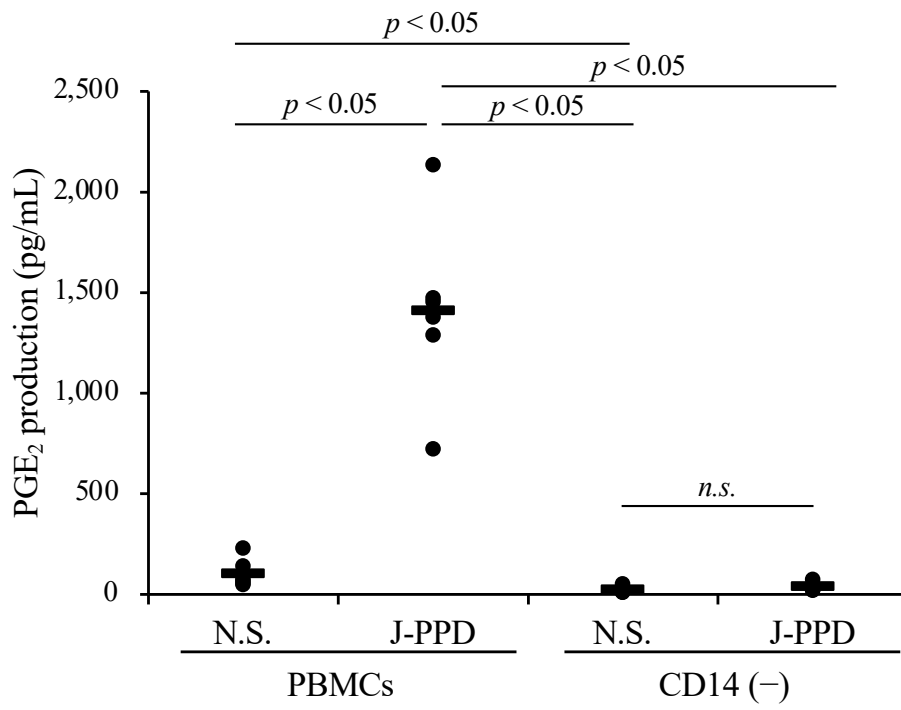

Fig. S2

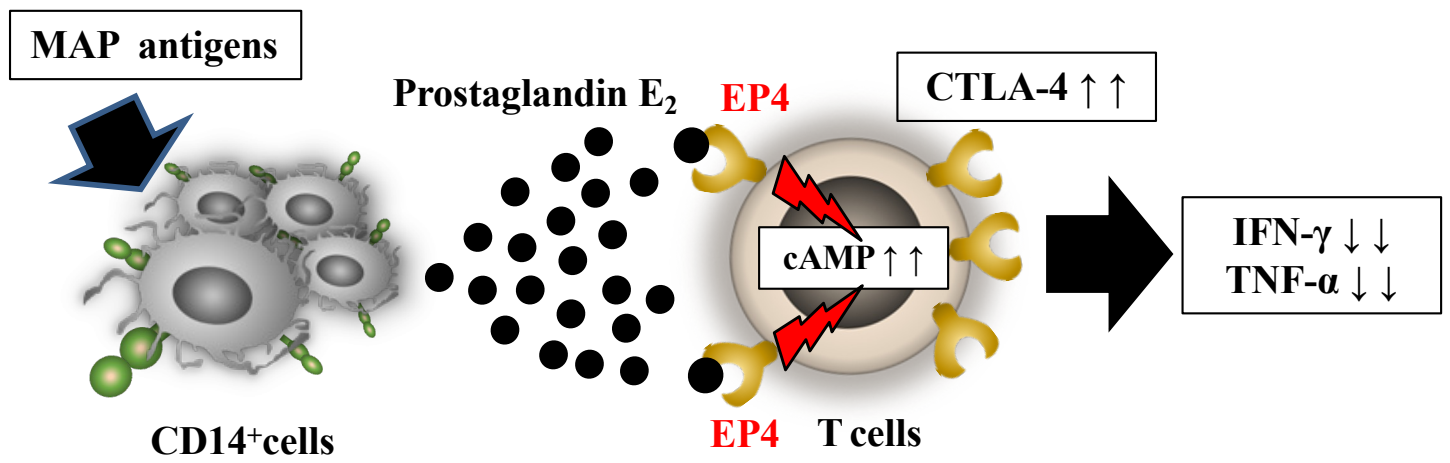

Fig. S3

### **Figure S1**

**The gating strategy used for CTLA-4 staining. Total lymphocytes were first gated in a forward scatter (FSC)/side scatter (SSC) plot (a) and then in a singlet population (b). Cells were subsequently gated for CD3<sup>+</sup>IgM<sup>-</sup> population (c) and further gated for CD4 or CD8 expression. Gated CD4<sup>+</sup> or CD8<sup>+</sup> T cells were analyzed for CTLA-4 expression, respectively. The fluorescence threshold for classifying the percentage of CTLA4<sup>+</sup> cells was determined by comparison to isotype control antibodies.**

### **Figure S2**

**PGE<sub>2</sub> production from PBMCs and CD14<sup>+</sup> cell-depleted PBMCs. PBMCs or CD14<sup>+</sup> cell-depleted PBMCs from *M. avium* subsp. paratuberculosis-infected cattle ( $n = 6$ ) were cultured in the presence of J-PPD. The concentrations of PGE<sub>2</sub> in culture supernatants were measured using ELISA. *P* values were obtained using Steel–Dwass tests. N.S.: no stimulation; CD14 (-): CD14<sup>+</sup> cell-depleted PBMCs.**

### **Figure S3**

**Diagram of PGE<sub>2</sub>-mediated immunosuppression by increased expression of CTLA-4 in Johne's disease.**
